# Supplementary material for: The sphere-to-rod transition of squaraine-embedded micelles: a self-assembly platform displays a distinct response to cysteine and homocysteine
Source: Royal Society of Chemistry journal article supplement (doi:10.1039/c3cc43223h), 2013-01-01
Supplement: c3cc43223h.pdf [file c3cc43223h.pdf]

Supporting Information for

## The sphere-to-rod transition of squaraine-embedded micelles: a self-assembly platform displays a distinct response to cysteine and homocysteine

Yongqian Xu,<sup>\*a</sup> Benhao Li,<sup>a</sup> Liangliang Xiao,<sup>a</sup> Weiwei Li,<sup>a</sup> Chenyuan Zhang,<sup>a</sup> Shiguo Sun<sup>\*a</sup> and Yi Pang<sup>b</sup>

<sup>a</sup> College of Science, Northwest A&F University, Yangling, Shaanxi, P.R. China, 712100, xuyq@nwsuaf.edu.cn

<sup>b</sup> Department of Chemistry & Maurice Morton Institute of Polymer Science, The University of Akron, Akron, OH, 44325

**Materials.** Natural amino acids, Hcy, SDS and CTAB were purchased from Xiaan Wolsen Bio. Reagents Co. (Xiaan, China) and were used as received unless specifically noted. CBT and sodium salicylate were purchased from Aladdin (China). Cationic squaraine dye, **SQ**, was synthesized and purified as reported previously.<sup>S1</sup>

### Measurements

Absorption and emission spectra were collected by using a Shimadzu 1750 UV-visible spectrometer and a RF-5301 fluorescence spectrometer (Japan), respectively. SEM images were observed at 75 K with a JSM-6701F scanning electron microscope.

**Sample Preparation and Titration.** Stock solutions of CBT and Cys (or Hcy) were mixed at 25<sup>0</sup>C with the 1:1 molar ratio of CBT to Cys (or Hcy) in aqueous solution for 3 min. Stock solution of **SQ** ( $5.0 \times 10^{-4}$  M) was prepared in ethanol and diluted to  $5.0 \times 10^{-6}$  M for titration experiments. CBT-Cys or CBT-Hcy solutions were added to **SQ** solution, UV and fluorescence spectra were monitored within 1 min.

**Preparation of human blood samples.** The procedure for preparation of human blood samples is followed the reported literature.<sup>S2</sup> Human blood samples were collected from healthy volunteers treated in the local Medical Hospital. All samples were obtained by venipuncture and collected in heparinized vacutainer tubes. Then, a 200  $\mu$ L aliquot of the blood was deproteinized by mixing immediately with 400  $\mu$ L of cold 10% Cl<sub>3</sub>CCOOH. After vortex mixing, the mixture was centrifuged at 8000 rpm for 10 min. A total of 400  $\mu$ L of the supernatant was collected. The obtained supernatant was ready for assays.

S1. Y. Xu, Z. Li, A. Malkovskiy, S. Sun and Y. Pang, *J. Phys. Chem. B*, 2010, 114, 8574.

S2. D. Tian, Z. Qian, Y. Xia and C. Zhu, *Langmuir*, 2012, 28, 3945.

**Table S1** Determination results of Cys in diluted human blood samples ( $n=3$ )

| Entry | without spiking | 0.21 mM Cys spiked | Recovery (%) |
|-------|-----------------|--------------------|--------------|
| 1     | 0.014±0.007     | 0.223±0.008        | 99.54±1.14   |
| 2     | 0.012±0.005     | 0.225±0.001        | 101.63±0.20  |
| 3     | 0.012±0.003     | 0.227±0.007        | 102.36±2.33  |

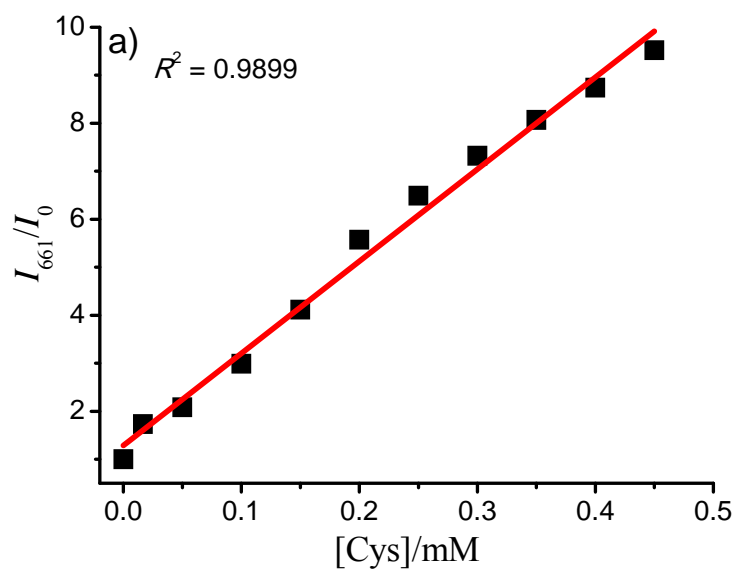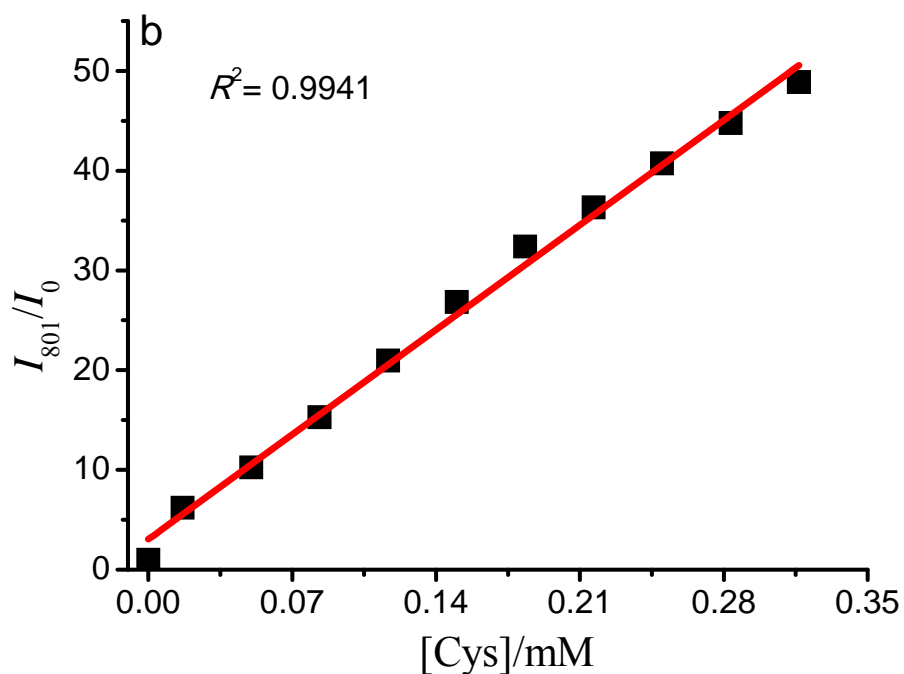

**Fig. S1** The relative fluorescence change of SQ ( $5.0 \times 10^{-6}$  M) at 661 (a) and 801 nm (b) in aqueous solution in the presence of CBT and CTAB (0.05% wt) with increasing concentrations of Cys as indicated (the molar ratio of CBT to Cys was fixed as 1:1.  $\lambda_{\text{ex}} = 600$  nm).

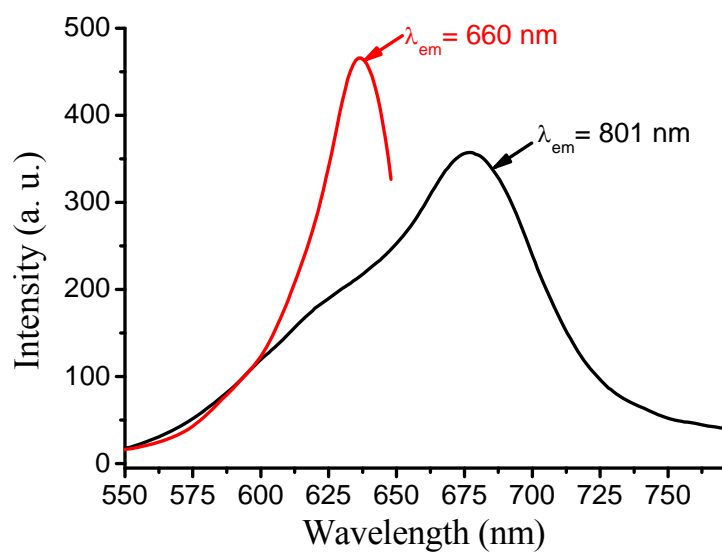

**Fig. S2** Excitation spectra of SQ ( $5.0 \times 10^{-6}$  M) in aqueous solution in the presence of CBT, CTAB (0.05% wt) upon addition of Cys, where [CBT] = [Cys] =  $1.5 \times 10^{-4}$  M and  $\lambda_{em} = 660$  and 801 nm respectively.

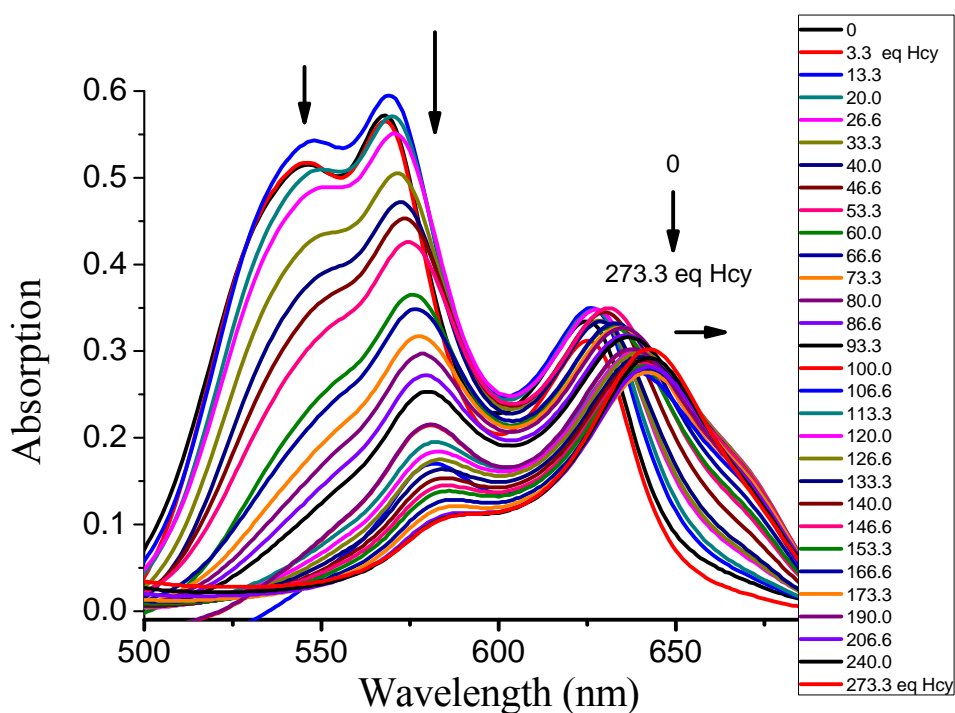

**Fig. S3** Absorption spectra change of SQ ( $5.0 \times 10^{-6}$  M) in aqueous solution containing CTAB (0.05% wt) with increasing concentrations of Hcy as indicated (the molar ratio of CBT to Hcy was fixed as 1:1).

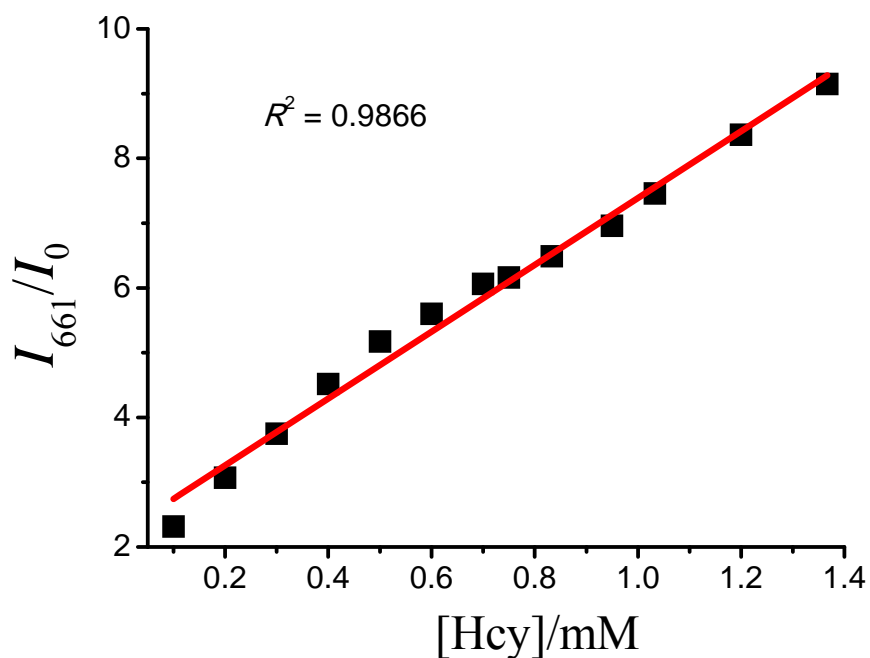

**Fig. S4** The relative fluorescence change of SQ ( $5.0 \times 10^{-6}$  M) at 661 nm in aqueous solution in the presence of CBT and CTAB (0.05% wt) with increasing concentrations of Hcy as indicated (the molar ratio of CBT to Hcy was fixed as 1:1.  $\lambda_{\text{ex}} = 600$  nm).

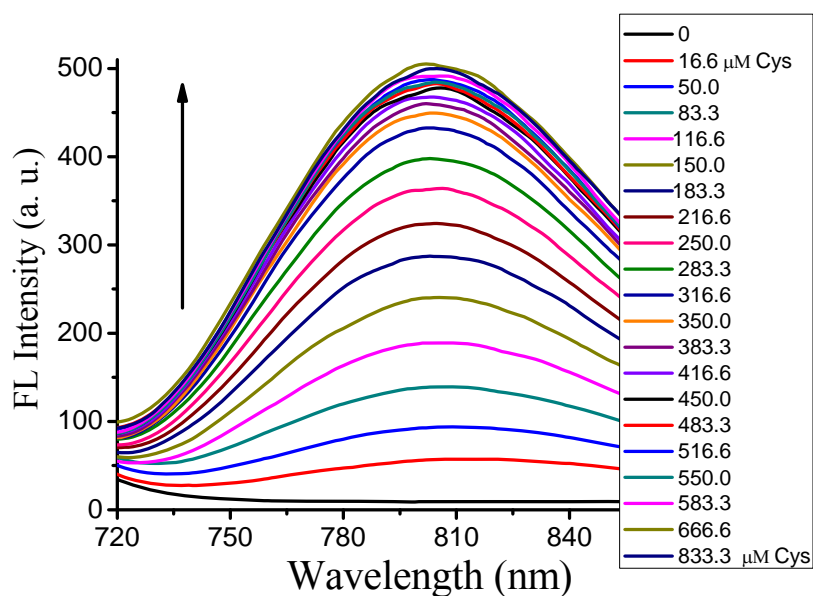

**Fig. S5** Variation in the emission spectra of SQ ( $5.0 \times 10^{-6}$  M) in aqueous solution containing CTAB (0.05% wt) with increasing concentrations of Cys as indicated (the molar ratio of CBT to Cys was fixed as 1:1 and  $\lambda_{\text{ex}} = 600$  nm).

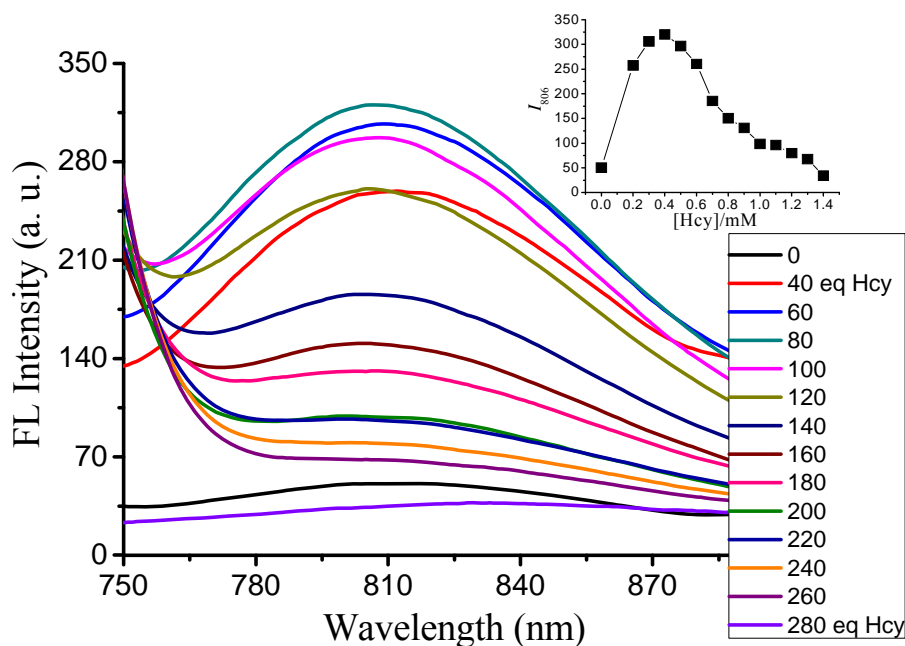

**Fig. S6** Variation in the emission spectra of SQ ( $5.0 \times 10^{-6}$  M) in aqueous solution containing CTAB (0.05% wt) with increasing concentrations of Hcy as indicated (the molar ratio of CBT to Hcy was fixed as 1:1 and  $\lambda_{\text{ex}} = 600$  nm. Inset: the response of fluorescence intensity at 806 nm to the concentration of Hcy).

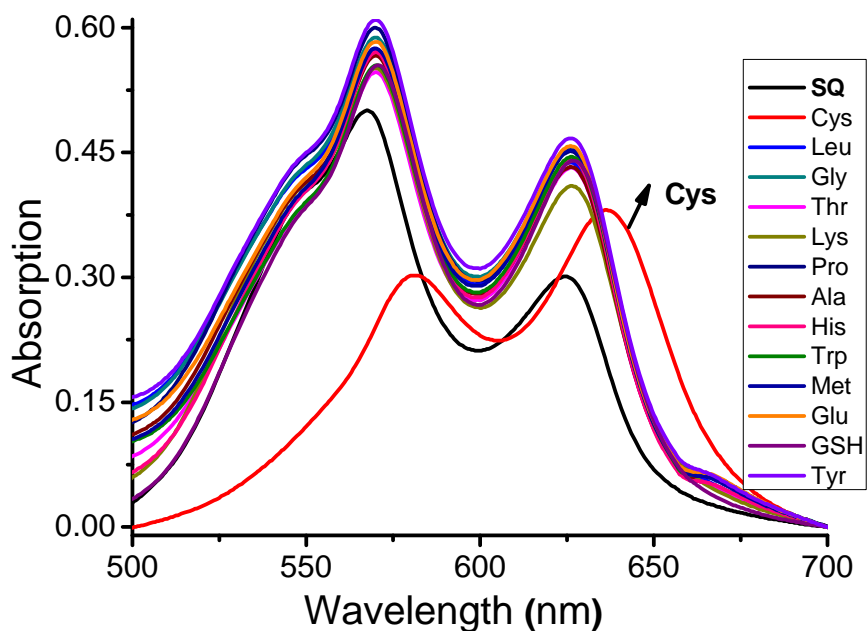

**Fig. S7** Absorption spectra of SQ ( $5.0 \times 10^{-6}$  M) alone and with various amino acids in aqueous solution in the presence of CBT and CTAB (0.05% wt), where  $[\text{CBT}] = [\text{amino acids}] = 4.5 \times 10^{-4}$  M.

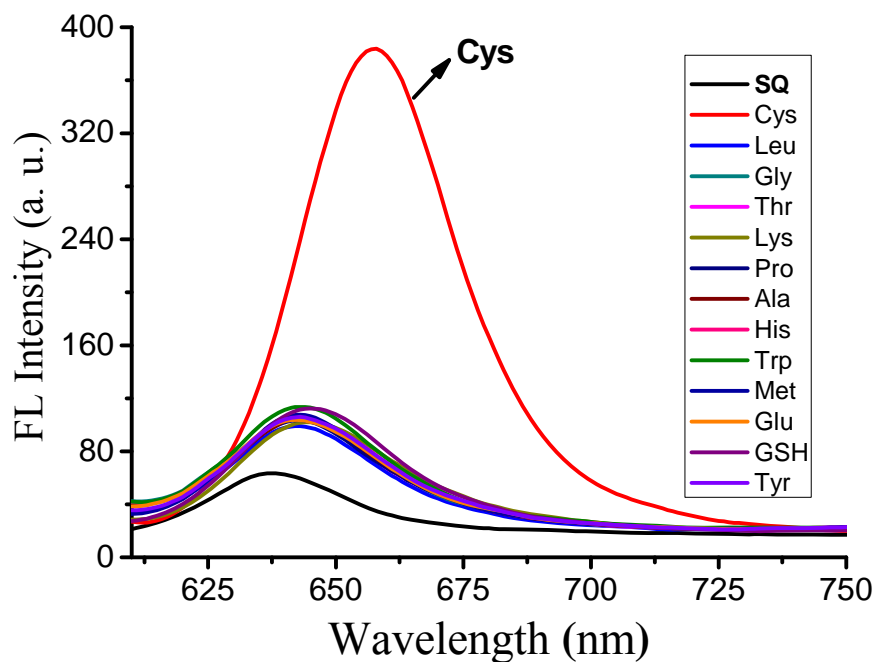

**Fig. S8** Fluorescence spectra of **SQ** ( $5.0 \times 10^{-6}$  M) alone and with various amino acids in aqueous solution in the presence of CBT and CTAB (0.05% wt), where  $[CBT] = [\text{amino acids}] = 4.5 \times 10^{-4}$  M and  $\lambda_{\text{ex}} = 600$  nm.

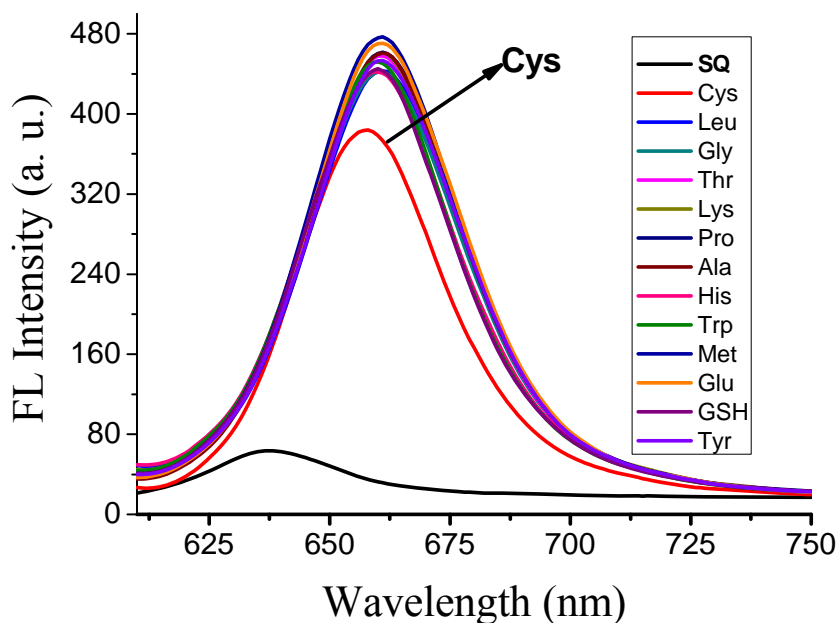

**Fig. S9** Fluorescence spectra of **SQ** ( $5.0 \times 10^{-6}$  M) with various amino acids and subsequent addition of Cys in aqueous solution in the presence of CBT and CTAB (0.05% wt), where  $[CBT] = [\text{amino acids}] = 4.5 \times 10^{-4}$  M and  $\lambda_{\text{ex}} = 600$  nm.

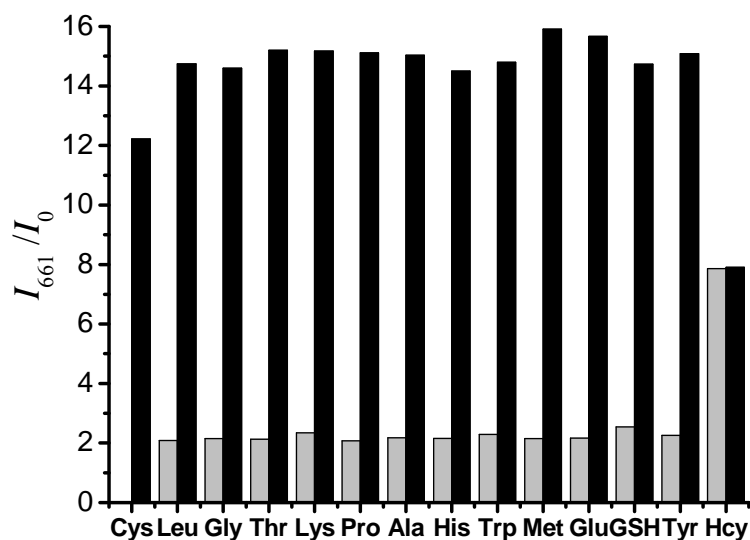

**Fig. S10** Emission intensity change ( $I_{661}/I_0$ ) of SQ ( $5.0 \times 10^{-6}$  M) at 661 nm in aqueous solution containing CBT and CTAB (0.05% wt) in the presence of different amino acids with excitation wavelength at 600 nm (dark bar). Black bars represent the intensity with subsequent addition of Cys ( $[CBT] = [\text{amino acids}] = 4.5 \times 10^{-4}$  M).  $I_0$  indicates the fluorescence intensity of free amino acids, while  $I_{661}$  indicated the fluorescence intensity upon addition of amino acids.

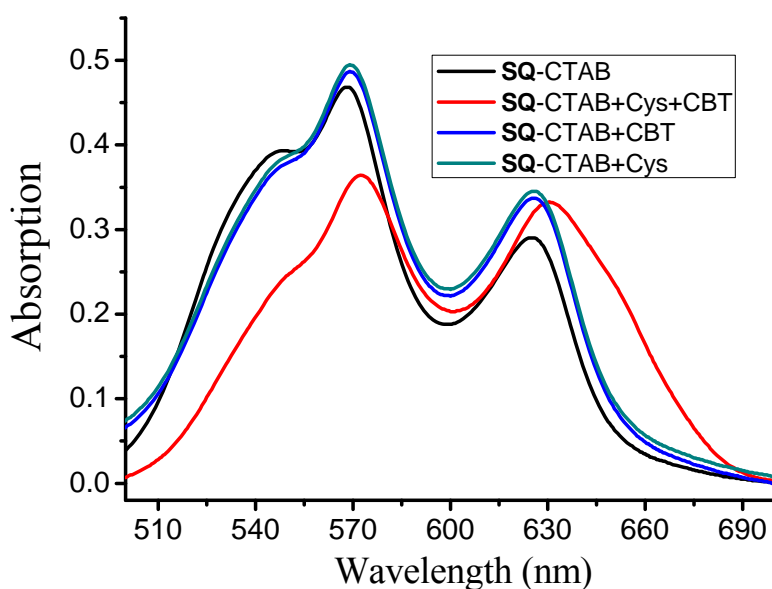

**Fig. S11** Absorption spectra of SQ ( $5.0 \times 10^{-6}$  M) in aqueous solution in the absence and the presence of CBT, CTAB (0.05% wt) and the mixture of CBT and Cys (CBT-Cys), where  $[CBT] = [Cys] = 1.5 \times 10^{-4}$  M.

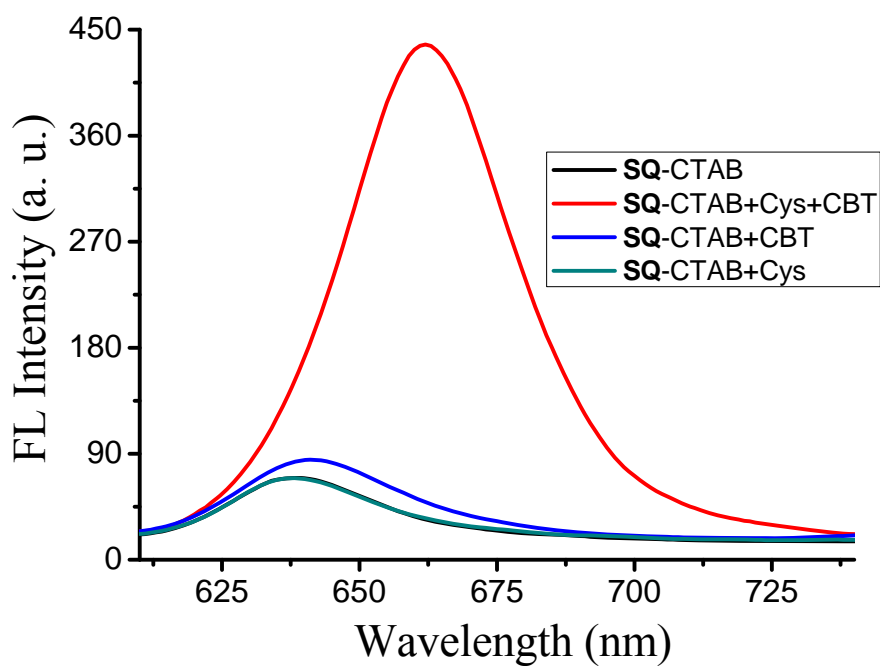

**Fig. S12** Fluorescence spectra of **SQ** ( $5.0 \times 10^{-6}$  M) in aqueous solution in the absence and the presence of CBT, CTAB (0.05% wt) and the mixture of CBT and Cys (CBT-Cys) ( $[CBT] = [Cys] = 1.5 \times 10^{-4}$  M. Excitation wavelength at 600 nm).

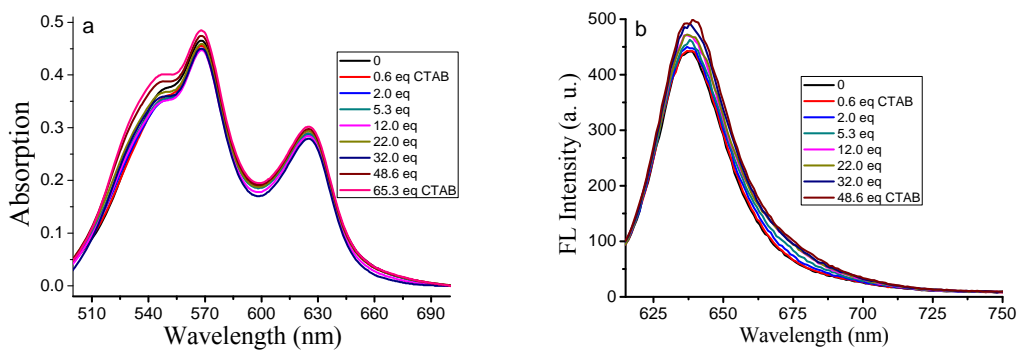

**Fig. S13** Absorption (a) and fluorescent (b) spectra change of **SQ** ( $5.0 \times 10^{-6}$  M) in aqueous solution upon addition of CTAB.



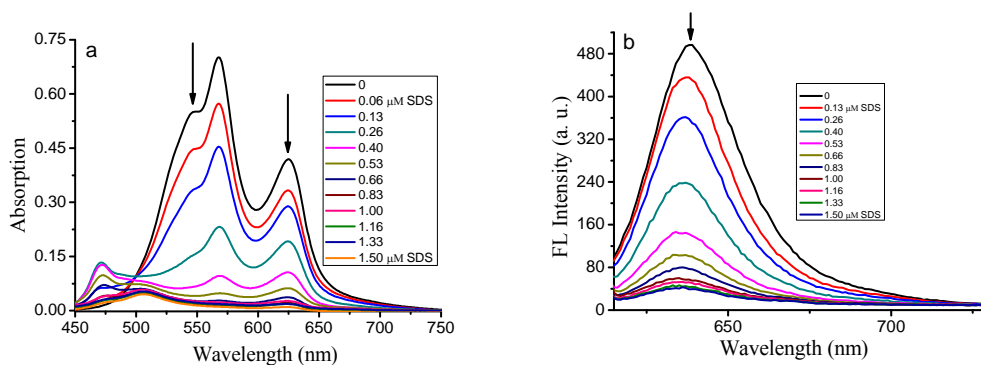

**Fig. S14** Absorption (a) and fluorescent (b) spectra change of **SQ** ( $5.0 \times 10^{-6}$  M) in aqueous solution upon addition of SDS.

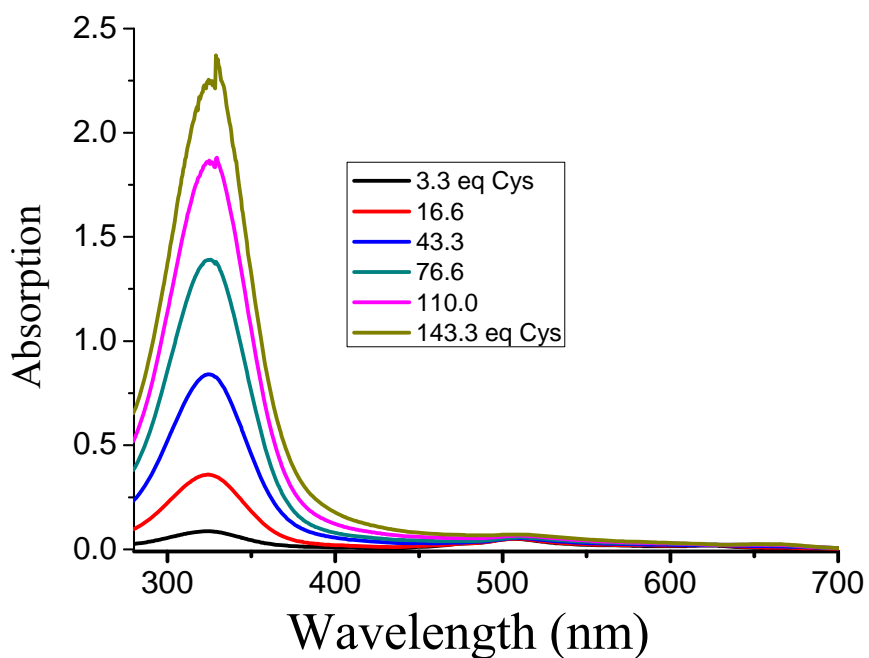

**Fig. S15** Absorption spectra change of **SQ** ( $5.0 \times 10^{-6}$  M) in aqueous solution containing SDS (1.5 μM) with increasing concentrations of Cys as indicated (the molar ratio of CBT to Cys was fixed as 1:1).

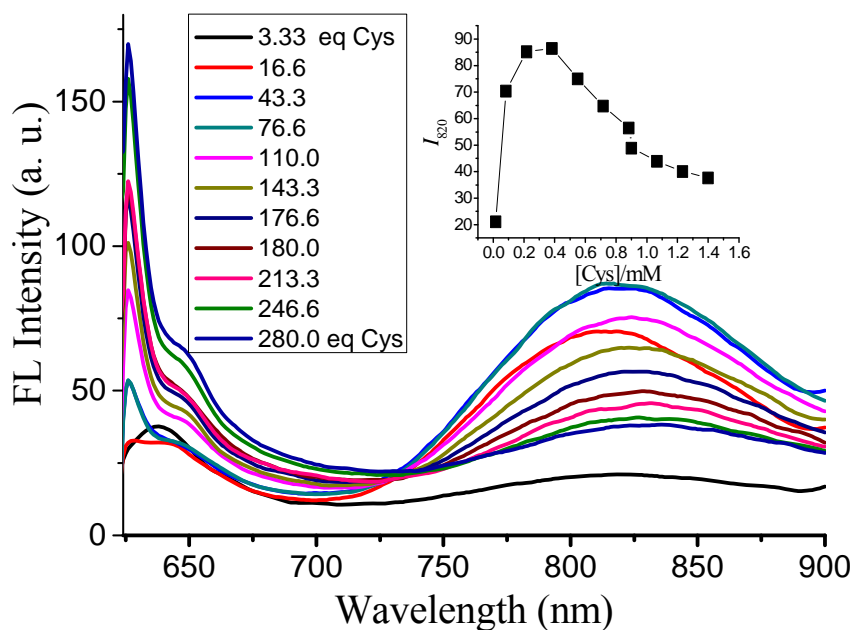

**Fig. S16** Variation in the emission spectra of **SQ** ( $5.0 \times 10^{-6}$  M) in aqueous solution containing SDS ( $1.5 \mu\text{M}$ ) with increasing concentrations of Cys as indicated (the molar ratio of CBT to Cys was fixed as 1:1 and  $\lambda_{\text{ex}} = 600$  nm. Inset: the response of fluorescence intensity at 820 nm to the concentration of Cys).

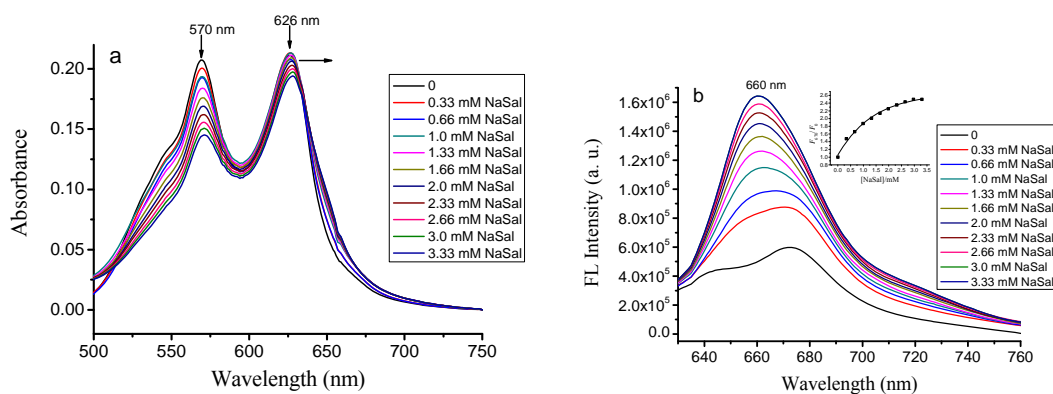

**Fig. S17** Absorption (a) and fluorescence (b) change of **SQ** ( $5 \mu\text{M}$ ) in aqueous upon addition of NaSal in the presence of  $333 \mu\text{M}$  of CTAB.

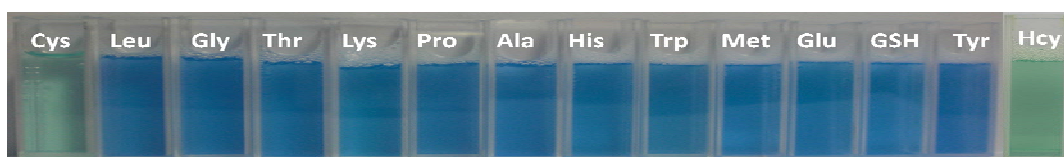

**Fig. S18** Color change of **SQ** ( $5.0 \times 10^{-6}$  M) with various amino acids and Hcy in aqueous solution in the presence of CBT and CTAB (0.05% wt), where  $[\text{CBT}] = [\text{amino acids}] = [\text{Hcy}] = 4.5 \times 10^{-4}$  M.

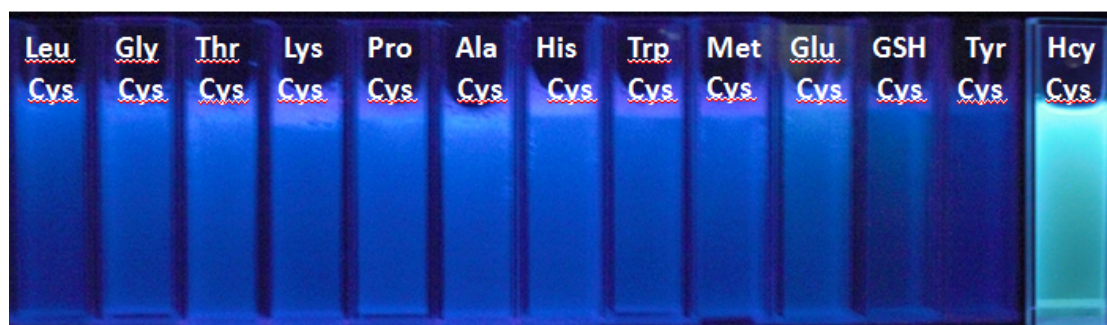

**Fig. S19** Fluorescence change of **SQ** ( $5.0 \times 10^{-6}$  M) with various amino acids and Hcy in aqueous solution in the presence of CBT, CTAB (0.05% wt) and Cys, where  $[CBT] = [\text{amino acids}] = [\text{Hcy}] = 4.5 \times 10^{-4}$  M, excitation by hand-hold UV lamp.

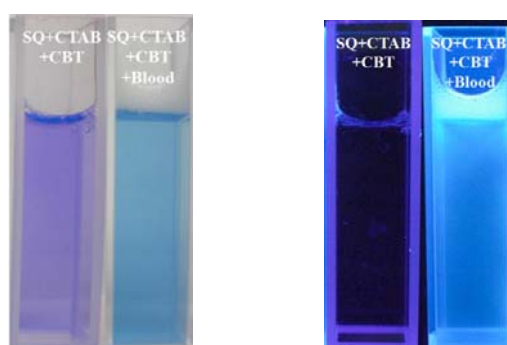

**Fig. S20** Color (left) and fluorescence (right) change of **SQ** ( $5.0 \times 10^{-6}$  M) before and after addition of human plasma in aqueous solution in the presence of CBT and CTAB (0.05% wt), where  $[CBT] = [\text{amino acids}] = [\text{Hcy}] = 4.5 \times 10^{-4}$  M, excitation by hand-hold UV lamp.

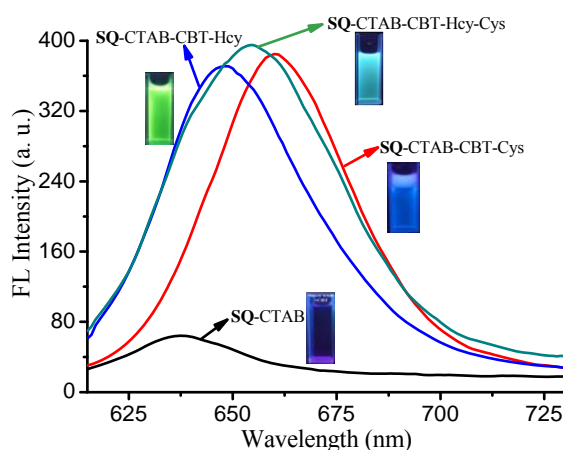

**Fig. S21** Fluorescence spectra of **SQ** ( $5.0 \times 10^{-6}$  M) in aqueous solution in the presence of CBT, CTAB (0.05% wt) upon addition of Cys, Hcy and mixture of them (1;1), where  $[CBT] = [\text{Cys}] = [\text{Hcy}] = 1.5 \times 10^{-4}$  M and  $\lambda_{\text{ex}} = 600$  nm. Inset: fluorescent images of solution excited by UV hand-hold lamp.

In the presence of both Cys and Hcy, the fluorescence spectrum of **SQ** solution is between that of Cys and Hcy.

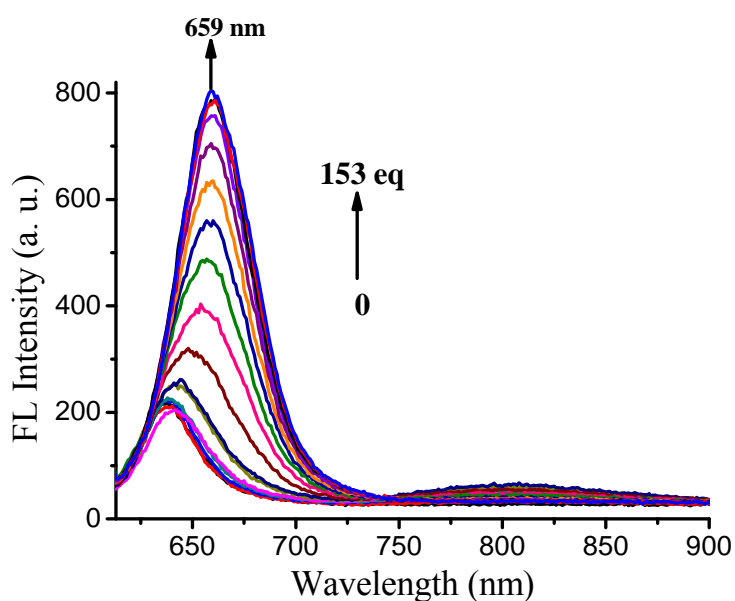

**Fig. S22** Variation in the emission spectra of **SQ** ( $5.0 \times 10^{-6}$  M) in aqueous solution containing CTAB (0.05% wt) and CBT with increasing equivalent of mixture (Cys and Hcy) as indicated (the molar ratio of [CBT]: [Cys]: [Hcy] = 2:1:1 and  $\lambda_{\text{ex}} = 600$  nm).

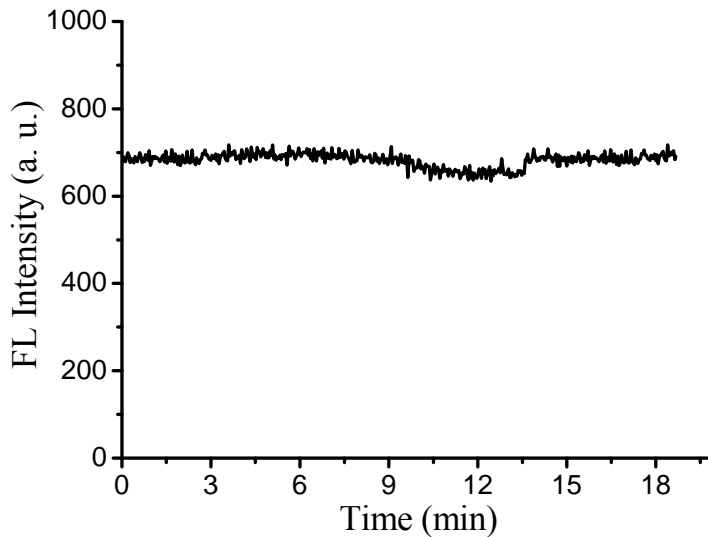

**Fig. S23** The fluorescence intensity change of **SQ** ( $5 \mu\text{M}$ ) at 661 nm in aqueous solution in the presence of luciferin derivatives (CBT and Cys) and CTAB (0.05% wt) with increasing reaction time as indicated, where [CBT] = [Cys] =  $8.0 \times 10^{-4}$  M (excitation wavelength at 600 nm).

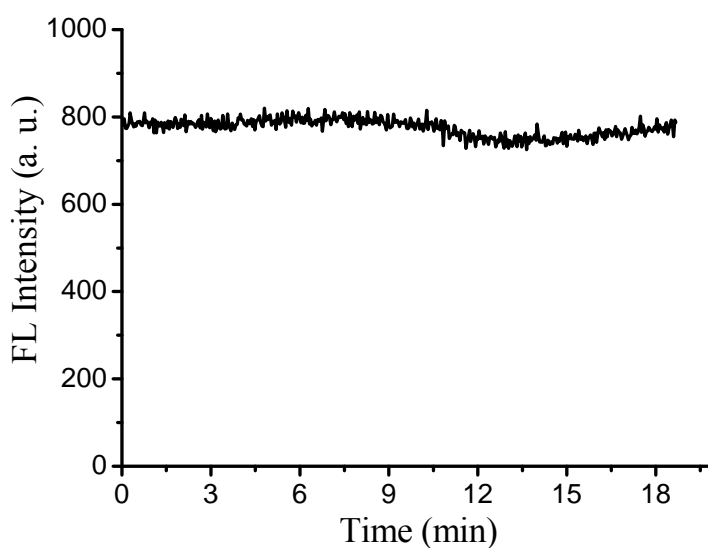

**Fig. S24** The fluorescence intensity change of **SQ** ( $5 \mu\text{M}$ ) at 648 nm in aqueous solution in the presence of luciferin derivatives (CBT and Hcy) and CTAB (0.05% wt) with increasing reaction time as indicated, where  $[\text{CBT}] = [\text{Hcy}] = 1.3 \times 10^{-3} \text{ M}$  (excitation wavelength at 600 nm).

The fluorescence changes at maximal intensity with increasing reaction time were investigated, which reflects the reaction kinetics of luciferin derivatives and CTAB. As shown in Fig. S23-24, these results indicated that their intermolecular equilibrium can level off very fast within 60 seconds.

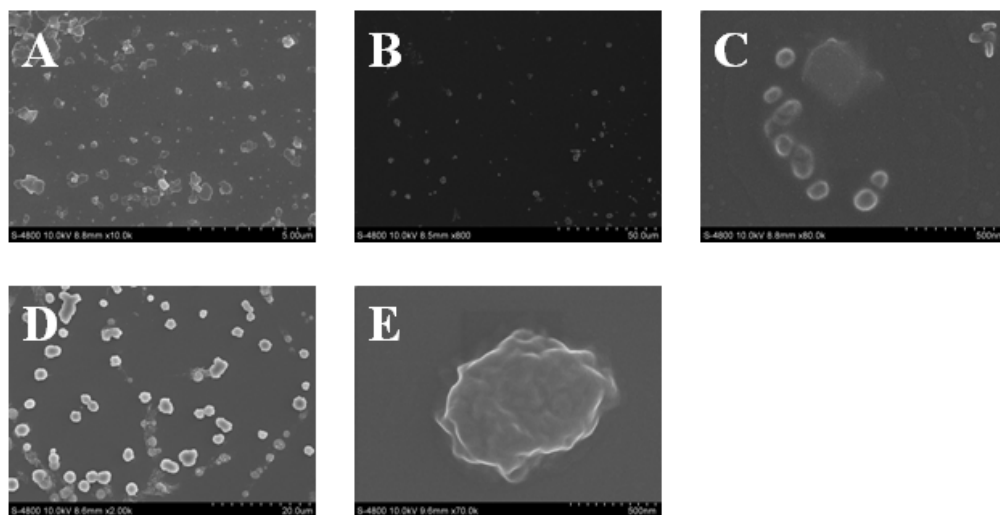

**Fig. S25** SEM images of **SQ**-embedded CTAB micelles in the presence of CBT, where (A) without addition of amino acids, (B) after addition of Cys, (C) after addition of Hcy, (D) and (E) after addition of mixture of Cys and Hcy.

The micelles of **SQ**-embedded CTAB micelles are elliptic in the presence of both Cys and Hcy, which are between sphere- and rod-like micelles.

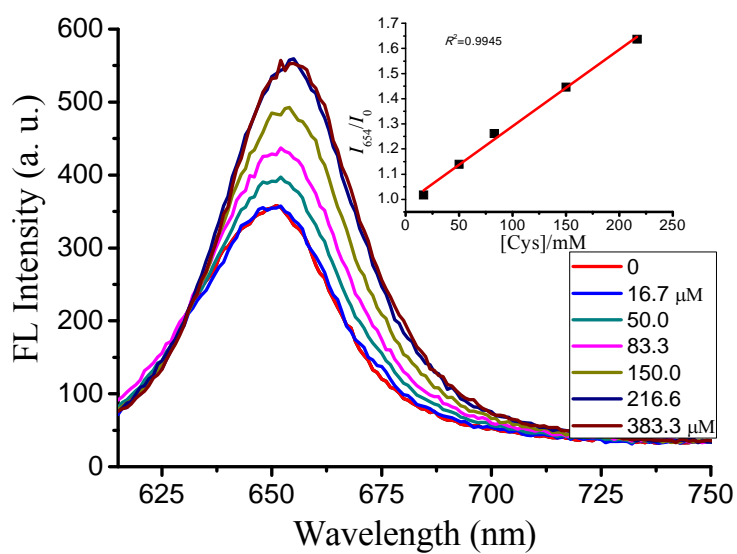

**Fig. S26** Variation in the emission spectra of SQ ( $5.0 \times 10^{-6}$  M) in human plasma containing CTAB (0.05% wt) and CBT with increasing concentrations of Cys as indicated (the molar ratio of CBT to Cys was fixed as 1:1 and  $\lambda_{\text{ex}} = 600$  nm). Inset: the relative fluorescence change at 654 nm with increasing concentrations of Cys as indicated.
